# Supplementary material for: Increased Extracellular Adenosine in Radiotherapy-Resistant Breast Cancer Cells Enhances Tumor Progression through A2AR-Akt-β-Catenin Signaling
Source: MDPI journal article supplement (doi:10.3390/cancers13092105), 2021-04-27
Supplement: s1 [file s1]

## Supplementary Materials

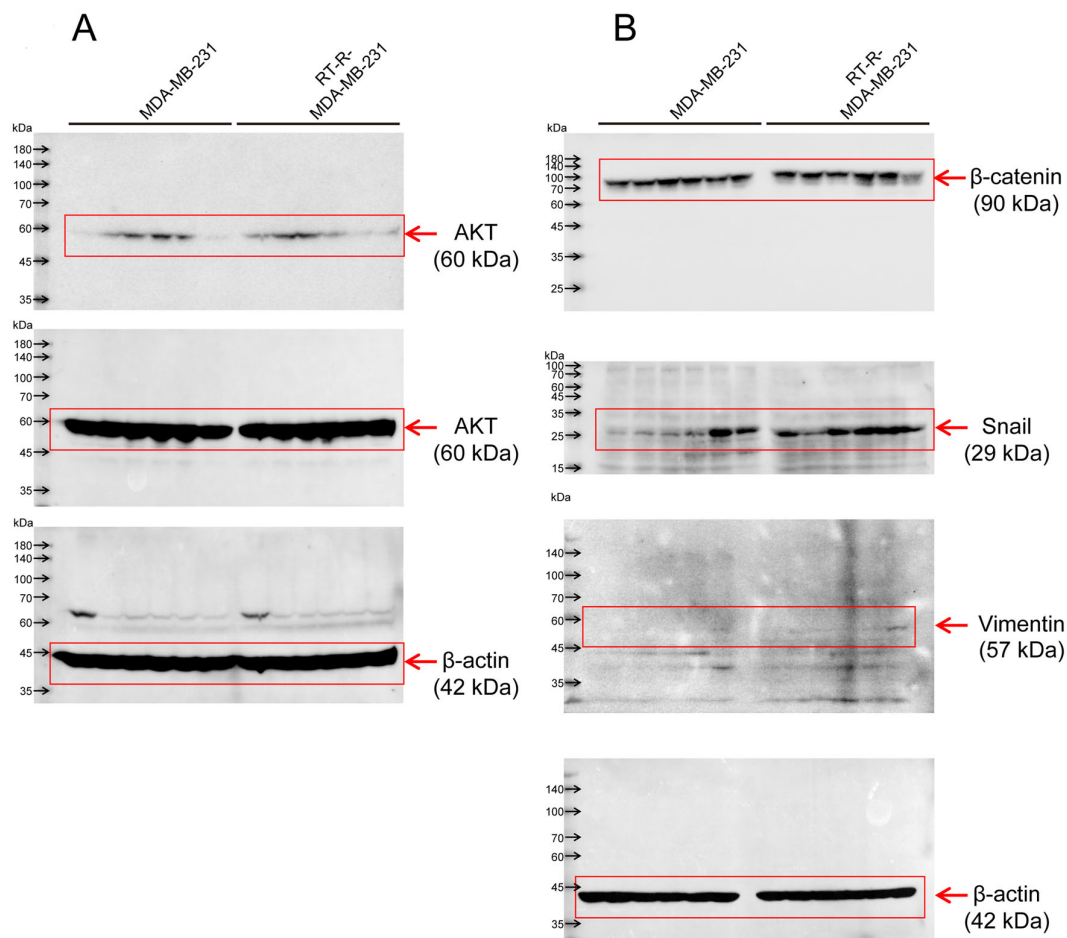

C

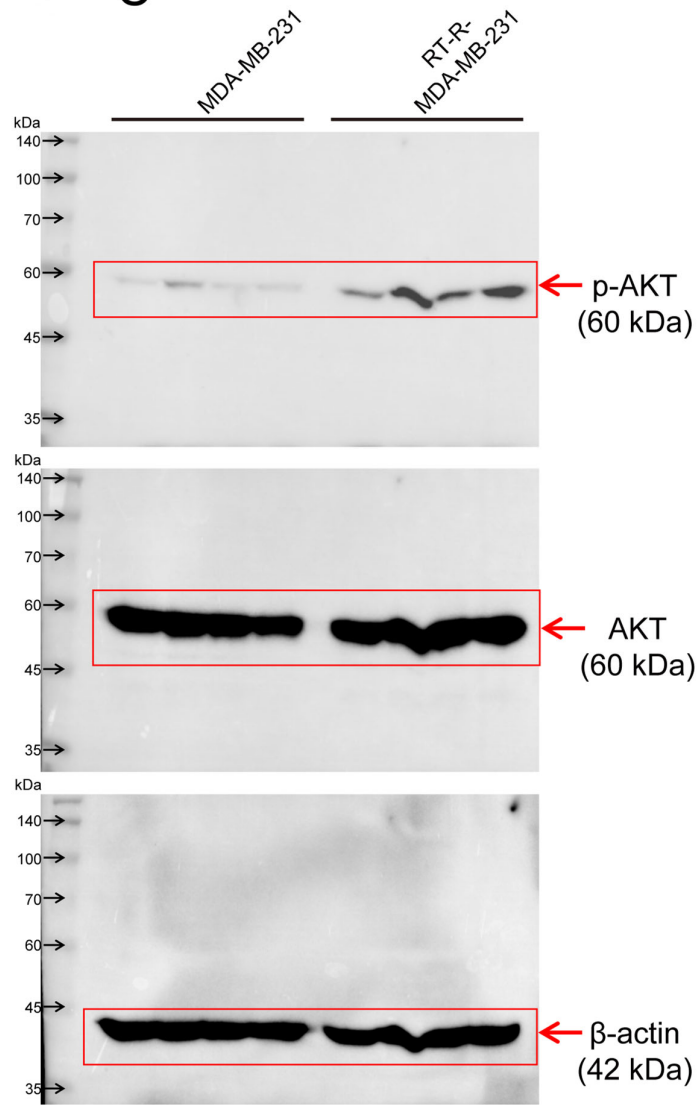

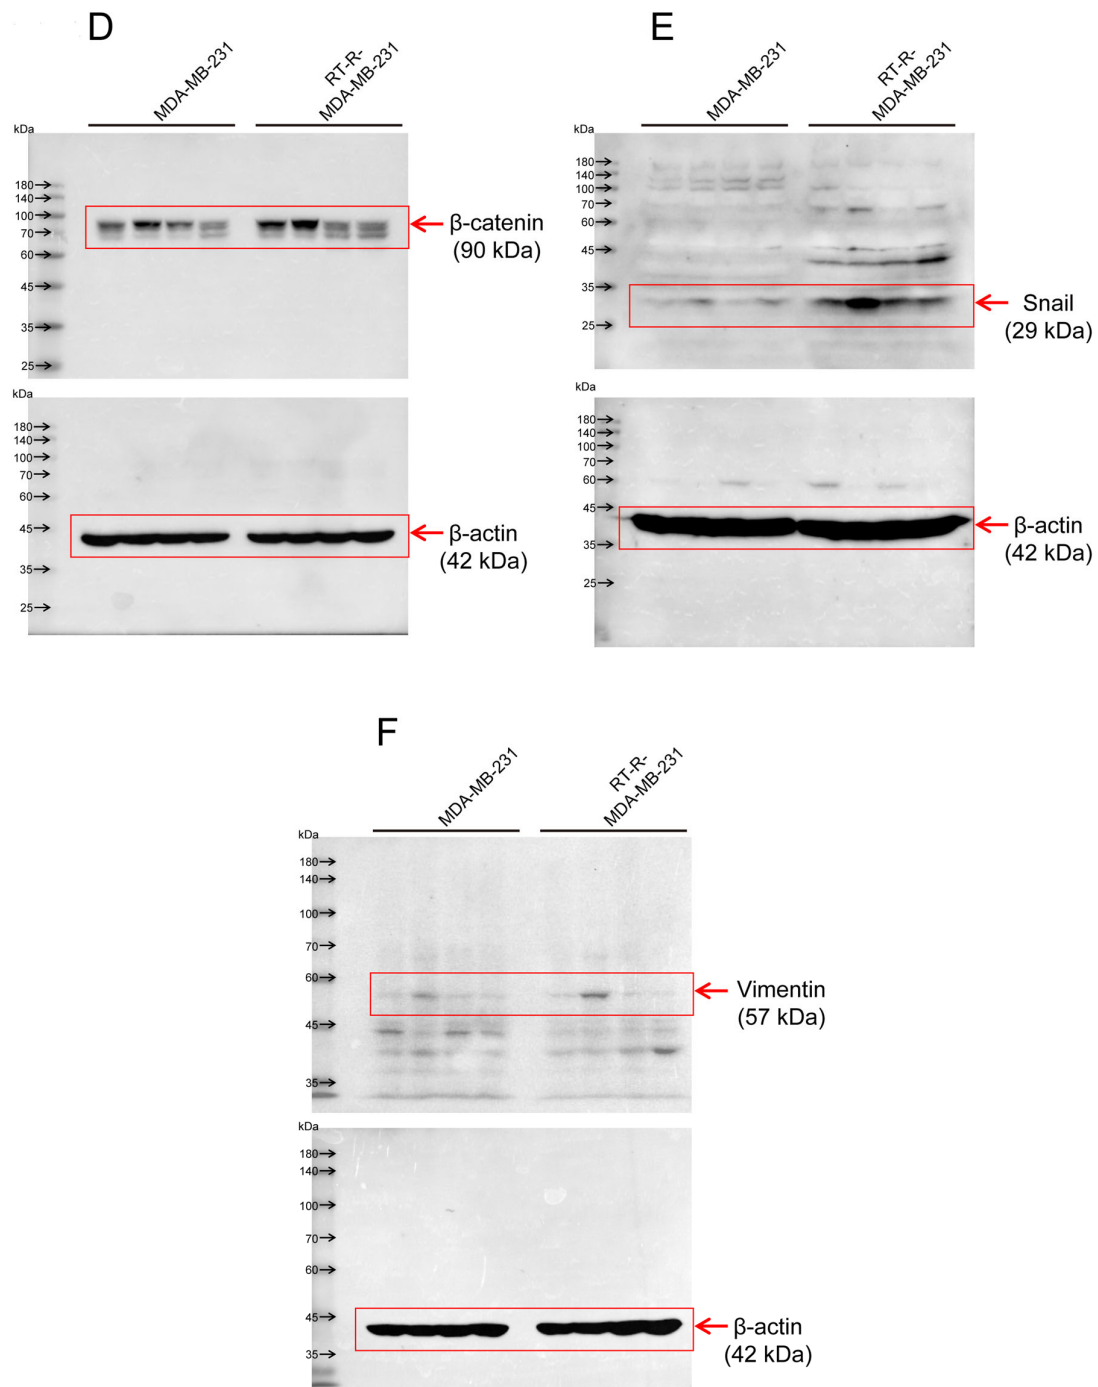

**Figure S1.** Raw images of Western blotting.

**Table S1:** Intensity ratios of western blots for Figure 5C

|       |                 |            |     | p-AKT    | AKT      | p-AKT/AKT | Fold of CTRL |
|-------|-----------------|------------|-----|----------|----------|-----------|--------------|
| Set 1 | MDA-MB-231      | CTRL siRNA | -   | 2347.51  | 20298.45 | 0.1156    | 1            |
|       |                 |            | ADO | 5004.72  | 16935.72 | 0.2955    | 2,5552       |
|       |                 | A2AR siRNA | -   | 2357.34  | 16374.48 | 0.1440    | 1,2448       |
|       |                 |            | ADO | 2807.41  | 15824.86 | 0.1774    | 1,5340       |
|       | RT-R-MDA-MB-231 | CTRL siRNA | -   | 5199.38  | 18416.98 | 0.2823    | 2,4411       |
|       |                 |            | ADO | 15224.91 | 19428.31 | 0.7836    | 6,7760       |
|       |                 | A2AR siRNA | -   | 6846.01  | 19849.72 | 0.3449    | 2,9822       |
|       |                 |            | ADO | 9478.86  | 21178.69 | 0.4476    | 3,8700       |
| Set 2 | MDA-MB-231      | CTRL siRNA | -   | 1514.14  | 21410.91 | 0.0707    | 1            |
|       |                 |            | ADO | 3868.74  | 17349.48 | 0.2230    | 3,1532       |
|       |                 | A2AR siRNA | -   | 1491.26  | 16931.67 | 0.0881    | 1,2454       |
|       |                 |            | ADO | 2581.26  | 19278.00 | 0.1339    | 1,8934       |
|       | RT-R-MDA-MB-231 | CTRL siRNA | -   | 3453.03  | 12795.40 | 0.2699    | 3,8161       |
|       |                 |            | ADO | 8336.67  | 15459.60 | 0.5393    | 7,6254       |
|       |                 | A2AR siRNA | -   | 3854.50  | 16162.38 | 0.2385    | 3,3723       |
|       |                 |            | ADO | 5600.81  | 21851.57 | 0.2563    | 3,6244       |
| Set 3 | MDA-MB-231      | CTRL siRNA | -   | 1394.01  | 19304.08 | 0.0722    | 1            |
|       |                 |            | ADO | 6059.52  | 21330.45 | 0.2841    | 3.9339       |
|       |                 | A2AR siRNA | -   | 1192.64  | 15385.26 | 0.0775    | 1.0735       |
|       |                 |            | ADO | 1161.36  | 20540.69 | 0.0565    | 0.7829       |
|       | RT-R-MDA-MB-231 | CTRL siRNA | -   | 5612.83  | 24500.71 | 0.2291    | 3.1724       |
|       |                 |            | ADO | 9735.15  | 20012.60 | 0.4865    | 6.7363       |
|       |                 | A2AR siRNA | -   | 5001.55  | 20559.84 | 0.2433    | 3.3687       |
|       |                 |            | ADO | 6687.03  | 20618.21 | 0.3243    | 4.4912       |
| Set 4 | MDA-MB-231      | CTRL siRNA | -   | 1351.44  | 24424.45 | 0.0553    | 1            |
|       |                 |            | ADO | 3192.04  | 22162.50 | 0.1440    | 2.6030       |
|       |                 | A2AR siRNA | -   | 1391.85  | 18448.96 | 0.0754    | 1.3635       |
|       |                 |            | ADO | 2088.41  | 18570.40 | 0.1125    | 2.0325       |
|       | RT-R-MDA-MB-231 | CTRL siRNA | -   | 4336.67  | 22741.57 | 0.1907    | 3.4464       |
|       |                 |            | ADO | 8560.03  | 19660.18 | 0.4354    | 7.8690       |
|       |                 | A2AR siRNA | -   | 2945.77  | 19546.01 | 0.1507    | 2.7238       |
|       |                 |            | ADO | 4829.74  | 23458.21 | 0.2059    | 3.7210       |
| Set 5 | MDA-MB-231      | CTRL siRNA | -   | 1591.55  | 11205.08 | 0.1420    | 1            |
|       |                 |            | ADO | 5275.69  | 13344.33 | 0.3954    | 2.7834       |
|       |                 | A2AR siRNA | -   | 1113.23  | 12786.26 | 0.0871    | 0.6130       |
|       |                 |            | ADO | 1212.79  | 13245.05 | 0.0916    | 0.6447       |
|       | RT-R-MDA-MB-231 | CTRL siRNA | -   | 4784.84  | 12979.23 | 0.3687    | 2.5955       |
|       |                 |            | ADO | 10861.86 | 10081.04 | 1.0775    | 7.5857       |
|       |                 | A2AR siRNA | -   | 5851.96  | 13378.43 | 0.4374    | 3.0796       |
|       |                 |            | ADO | 7419.38  | 12282.62 | 0.6041    | 4.2528       |

**Table S2:** Summary of relative p-Akt/Akt protein levels for Figure 5C

| p-AKT/AKT             | MDA-MB-231 |               |               |               | RT-R-MDA-MB-231 |               |               |               |
|-----------------------|------------|---------------|---------------|---------------|-----------------|---------------|---------------|---------------|
|                       | CTRL siRNA |               | A2AR siRNA    |               | CTRL siRNA      |               | A2AR siRNA    |               |
|                       | -          | ADO           | -             | ADO           | -               | ADO           | -             | ADO           |
| <i>n</i> = 1          | 1          | 2.5552        | 1.2448        | 1.5340        | 2.4411          | 6.7760        | 2.9822        | 3.8700        |
| <i>n</i> = 2          | 1          | 3.1532        | 1.2454        | 1.8934        | 3.8161          | 7.6254        | 3.3723        | 3.6244        |
| <i>n</i> = 3          | 1          | 3.9339        | 1.0735        | 0.7829        | 3.1724          | 6.7363        | 3.3687        | 4.4912        |
| <i>n</i> = 4          | 1          | 2.6030        | 1.3635        | 2.0325        | 3.4464          | 7.8690        | 2.7238        | 3.7210        |
| <i>n</i> = 5          | 1          | 2.7834        | 0.6130        | 0.6447        | 2.5955          | 7.5857        | 3.0796        | 4.2528        |
| <b>Mean</b>           | <b>1</b>   | <b>3.006</b>  | <b>1.108</b>  | <b>1.377</b>  | <b>3.094</b>    | <b>7.318</b>  | <b>3.105</b>  | <b>3.992</b>  |
| <b>Std. Deviation</b> | <b>0</b>   | <b>0.5696</b> | <b>0.2954</b> | <b>0.6345</b> | <b>0.5759</b>   | <b>0.5248</b> | <b>0.2748</b> | <b>0.3677</b> |

Std. Error of Mean      0      0.2547      0.1321      0.2837      0.2575      0.2347      0.1229      0.1644

**Table S3:** Intensity ratios of western blots for Figure 5D

|       |                 |            |     | $\beta$ -catenin | $\beta$ -actin | $\beta$ -catenin/ $\beta$ -actin | Fold of CTRL |
|-------|-----------------|------------|-----|------------------|----------------|----------------------------------|--------------|
| Set 1 | MDA-MB-231      | CTRL siRNA | -   | 5822.43          | 24244.38       | 0.2402                           | 1            |
|       |                 |            | ADO | 10333.38         | 20812.84       | 0.4965                           | 2.0674       |
|       |                 | A2AR siRNA | -   | 4303.26          | 19334.65       | 0.2226                           | 0.9268       |
|       |                 |            | ADO | 4584.48          | 19380.98       | 0.2365                           | 0.9850       |
|       | RT-R-MDA-MB-231 | CTRL siRNA | -   | 12804.79         | 20816.15       | 0.6151                           | 2.5614       |
|       |                 |            | ADO | 19233.55         | 19682.89       | 0.9772                           | 4.0689       |
|       |                 | A2AR siRNA | -   | 4559.31          | 20510.01       | 0.2223                           | 0.9256       |
|       |                 |            | ADO | 5011.72          | 24831.28       | 0.2018                           | 0.8404       |
| Set 2 | MDA-MB-231      | CTRL siRNA | -   | 6145.67          | 22149.62       | 0.2775                           | 1            |
|       |                 |            | ADO | 11360.50         | 20723.67       | 0.5482                           | 1.9757       |
|       |                 | A2AR siRNA | -   | 6298.79          | 16937.43       | 0.3719                           | 1.3403       |
|       |                 |            | ADO | 8728.62          | 19940.45       | 0.4377                           | 1.5776       |
|       | RT-R-MDA-MB-231 | CTRL siRNA | -   | 11032.62         | 19181.91       | 0.5752                           | 2.0729       |
|       |                 |            | ADO | 17337.67         | 16995.84       | 1.0201                           | 3.6766       |
|       |                 | A2AR siRNA | -   | 5247.13          | 17115.96       | 0.3066                           | 1.1049       |
|       |                 |            | ADO | 5590.74          | 17103.79       | 0.3269                           | 1.1781       |
| Set 3 | MDA-MB-231      | CTRL siRNA | -   | 5178.50          | 24911.79       | 0.2079                           | 1            |
|       |                 |            | ADO | 7788.13          | 19353.01       | 0.4024                           | 1.9359       |
|       |                 | A2AR siRNA | -   | 5217.01          | 16283.77       | 0.3204                           | 1.5412       |
|       |                 |            | ADO | 5308.91          | 18500.57       | 0.2870                           | 1.3805       |
|       | RT-R-MDA-MB-231 | CTRL siRNA | -   | 10901.10         | 16566.74       | 0.6580                           | 3.1654       |
|       |                 |            | ADO | 14281.38         | 16977.43       | 0.8412                           | 4.0467       |
|       |                 | A2AR siRNA | -   | 8513.50          | 15989.43       | 0.5324                           | 2.5614       |
|       |                 |            | ADO | 8515.08          | 18129.26       | 0.4697                           | 2.2595       |
| Set 4 | MDA-MB-231      | CTRL siRNA | -   | 6608.08          | 23308.21       | 0.2835                           | 1            |
|       |                 |            | ADO | 9902.43          | 20189.67       | 0.4905                           | 1.7300       |
|       |                 | A2AR siRNA | -   | 7665.08          | 16658.65       | 0.4601                           | 1.6230       |
|       |                 |            | ADO | 6596.10          | 16534.50       | 0.3989                           | 1.4071       |
|       | RT-R-MDA-MB-231 | CTRL siRNA | -   | 17259.69         | 19418.33       | 0.8888                           | 3.1351       |
|       |                 |            | ADO | 22610.67         | 21903.13       | 1.0323                           | 3.6412       |
|       |                 | A2AR siRNA | -   | 13705.79         | 18667.89       | 0.7342                           | 2.5897       |
|       |                 |            | ADO | 14814.91         | 20999.43       | 0.7055                           | 2.4884       |
| Set 5 | MDA-MB-231      | CTRL siRNA | -   | 4006.55          | 16249.96       | 0.2466                           | 1.0000       |
|       |                 |            | ADO | 8869.50          | 18197.96       | 0.4874                           | 1.9768       |
|       |                 | A2AR siRNA | -   | 3951.08          | 18318.72       | 0.2157                           | 0.8748       |
|       |                 |            | ADO | 4164.15          | 17601.45       | 0.2366                           | 0.9595       |
|       | RT-R-MDA-MB-231 | CTRL siRNA | -   | 10369.81         | 17396.50       | 0.5961                           | 2.4176       |
|       |                 |            | ADO | 17501.91         | 18696.01       | 0.9361                           | 3.7968       |
|       |                 | A2AR siRNA | -   | 13364.38         | 20712.13       | 0.6452                           | 2.6170       |
|       |                 |            | ADO | 14171.79         | 19199.67       | 0.7381                           | 2.9937       |

**Table S4.** Summary of relative  $\beta$ -catenin/ $\beta$ -actin protein levels for Figure 5D

| $\beta$ -catenin/ $\beta$ -actin | MDA-MB-231 |        |            |        | RT-R-MDA-MB-231 |        |            |        |
|----------------------------------|------------|--------|------------|--------|-----------------|--------|------------|--------|
|                                  | CTRL siRNA |        | A2AR siRNA |        | CTRL siRNA      |        | A2AR siRNA |        |
|                                  | -          | ADO    | -          | ADO    | -               | ADO    | -          | ADO    |
| $n = 1$                          | 1          | 2.0674 | 0.9268     | 0.9850 | 2.5614          | 4.0689 | 0.9256     | 0.8404 |
| $n = 2$                          | 1          | 1.9757 | 1.3403     | 1.5776 | 2.0729          | 3.6766 | 1.1049     | 1.1781 |
| $n = 3$                          | 1          | 1.9359 | 1.5412     | 1.3805 | 3.1654          | 4.0467 | 2.5614     | 2.2595 |
| $n = 4$                          | 1          | 1.7300 | 1.6230     | 1.4071 | 3.1351          | 3.6412 | 2.5897     | 2.4884 |

|                    |   |         |        |        |        |         |        |        |
|--------------------|---|---------|--------|--------|--------|---------|--------|--------|
| $n = 5$            | 1 | 1.9768  | 0.8748 | 0.9595 | 2.4176 | 3.7968  | 2.6170 | 2.9937 |
| Mean               | 1 | 1.937   | 1.261  | 1.262  | 2.671  | 3.846   | 1.96   | 1.952  |
| Std. Deviation     | 0 | 0.1254  | 0.3452 | 0.2752 | 0.4727 | 0.2019  | 0.8647 | 0.9086 |
| Std. Error of Mean | 0 | 0.05609 | 0.1544 | 0.1231 | 0.2114 | 0.09029 | 0.3867 | 0.4063 |

**Table S5.** Intensity ratios of western blots for Figure 5E

|       |                 |            |     | Snail    | $\beta$ -actin | Snail/ $\beta$ -actin | Fold of CTRL |
|-------|-----------------|------------|-----|----------|----------------|-----------------------|--------------|
| Set 1 | MDA-MB-231      | CTRL siRNA | -   | 1048.97  | 18771.74       | 0.0559                | 1            |
|       |                 |            | ADO | 2546.03  | 21940.01       | 0.1160                | 2.0767       |
|       |                 | A2AR siRNA | -   | 839.78   | 25920.26       | 0.0324                | 0.5798       |
|       |                 |            | ADO | 2007.57  | 22565.77       | 0.0890                | 1.5921       |
|       | RT-R-MDA-MB-231 | CTRL siRNA | -   | 5069.10  | 25855.64       | 0.1961                | 3.5085       |
|       |                 |            | ADO | 10464.33 | 17068.53       | 0.6131                | 10.9713      |
|       |                 | A2AR siRNA | -   | 6172.72  | 23217.55       | 0.2659                | 4.7577       |
|       |                 |            | ADO | 4087.03  | 26189.50       | 0.1561                | 2.7927       |
| Set 2 | MDA-MB-231      | CTRL siRNA | -   | 1503.13  | 20055.28       | 0.0749                | 1            |
|       |                 |            | ADO | 4796.81  | 20361.06       | 0.2356                | 3.1433       |
|       |                 | A2AR siRNA | -   | 1537.01  | 20563.57       | 0.0747                | 0.9973       |
|       |                 |            | ADO | 1665.81  | 17506.98       | 0.0952                | 1.2695       |
|       | RT-R-MDA-MB-231 | CTRL siRNA | -   | 4886.81  | 13975.21       | 0.3497                | 4.6655       |
|       |                 |            | ADO | 9142.35  | 11801.77       | 0.7747                | 10.3357      |
|       |                 | A2AR siRNA | -   | 5337.84  | 21116.45       | 0.2528                | 3.3727       |
|       |                 |            | ADO | 3548.21  | 26043.15       | 0.1362                | 1.8178       |
| Set 3 | MDA-MB-231      | CTRL siRNA | -   | 500.09   | 22525.55       | 0.0222                | 1            |
|       |                 |            | ADO | 2157.35  | 23654.43       | 0.0912                | 4.1080       |
|       |                 | A2AR siRNA | -   | 508.41   | 19917.72       | 0.0255                | 1.1497       |
|       |                 |            | ADO | 505.38   | 19607.21       | 0.0258                | 1.1610       |
|       | RT-R-MDA-MB-231 | CTRL siRNA | -   | 818.93   | 18270.08       | 0.0448                | 2.0190       |
|       |                 |            | ADO | 4796.08  | 18540.72       | 0.2587                | 11.6516      |
|       |                 | A2AR siRNA | -   | 822.76   | 17046.77       | 0.0483                | 2.1740       |
|       |                 |            | ADO | 827.11   | 18082.84       | 0.0457                | 2.0603       |
| Set 4 | MDA-MB-231      | CTRL siRNA | -   | 1188.41  | 21368.38       | 0.0556                | 1            |
|       |                 |            | ADO | 4768.69  | 21395.77       | 0.2229                | 4.0075       |
|       |                 | A2AR siRNA | -   | 1178.91  | 20473.26       | 0.0576                | 1.0354       |
|       |                 |            | ADO | 1534.69  | 21507.74       | 0.0714                | 1.2830       |
|       | RT-R-MDA-MB-231 | CTRL siRNA | -   | 5605.62  | 23243.10       | 0.2412                | 4.3365       |
|       |                 |            | ADO | 11917.98 | 17864.11       | 0.6671                | 11.9958      |
|       |                 | A2AR siRNA | -   | 3922.13  | 21335.01       | 0.1838                | 3.3055       |
|       |                 |            | ADO | 5746.74  | 20945.57       | 0.2744                | 4.9333       |
| Set 5 | MDA-MB-231      | CTRL siRNA | -   | 4515.01  | 22167.81       | 0.2037                | 1            |
|       |                 |            | ADO | 6635.28  | 16198.82       | 0.4096                | 2.0111       |
|       |                 | A2AR siRNA | -   | 3862.39  | 22260.33       | 0.1735                | 0.8519       |
|       |                 |            | ADO | 4102.26  | 15838.13       | 0.2590                | 1.2717       |
|       | RT-R-MDA-MB-231 | CTRL siRNA | -   | 12689.43 | 21119.88       | 0.6008                | 2.9499       |
|       |                 |            | ADO | 21594.52 | 15366.99       | 1.4053                | 6.8995       |
|       |                 | A2AR siRNA | -   | 10116.13 | 15259.58       | 0.6629                | 3.2549       |
|       |                 |            | ADO | 18449.96 | 22468.03       | 0.8212                | 4.0318       |

**Table S6.** Summary of relative Snail/ $\beta$ -actin protein levels for Figure 5E

| Snail/ $\beta$ -actin | MDA-MB-231 |        |            |        | RT-R-MDA-MB-231 |         |            |        |
|-----------------------|------------|--------|------------|--------|-----------------|---------|------------|--------|
|                       | CTRL siRNA |        | A2AR siRNA |        | CTRL siRNA      |         | A2AR siRNA |        |
|                       | -          | ADO    | -          | ADO    | -               | ADO     | -          | ADO    |
| $n = 1$               | 1          | 2.0767 | 0.5798     | 1.5921 | 3.5085          | 10.9713 | 4.7577     | 2.7927 |
| $n = 2$               | 1          | 3.1433 | 0.9973     | 1.2695 | 4.6655          | 10.3357 | 3.3727     | 1.8178 |

|                    |   |        |         |         |        |         |        |        |
|--------------------|---|--------|---------|---------|--------|---------|--------|--------|
| $n = 3$            | 1 | 4.1080 | 1.1497  | 1.1610  | 2.0190 | 11.6516 | 2.1740 | 2.0603 |
| $n = 4$            | 1 | 4.0075 | 1.0354  | 1.2830  | 4.3365 | 11.9958 | 3.3055 | 4.9333 |
| $n = 5$            | 1 | 2.0111 | 0.8519  | 1.2717  | 2.9499 | 6.8995  | 3.2549 | 4.0318 |
| Mean               | 1 | 3.069  | 0.9228  | 1.315   | 3.496  | 10.37   | 3.373  | 3.127  |
| Std. Deviation     | 0 | 1.009  | 0.2193  | 0.1624  | 1.067  | 2.043   | 0.9184 | 1.327  |
| Std. Error of Mean | 0 | 0.4511 | 0.09808 | 0.07261 | 0.4772 | 0.9136  | 0.4107 | 0.5935 |

**Table S7.** Intensity ratios of western blots for Figure 5F

|       |                 |            | Vimentin | $\beta$ -actin | Vimentin/ $\beta$ -actin | Fold of CTRL |
|-------|-----------------|------------|----------|----------------|--------------------------|--------------|
| Set 1 | MDA-MB-231      | CTRL siRNA | -        | 8840.02        | 18759.28                 | 1            |
|       |                 |            | ADO      | 22037.31       | 19036.13                 | 1.1577       |
|       |                 | A2AR siRNA | -        | 8659.70        | 17925.99                 | 1.0251       |
|       |                 |            | ADO      | 8142.27        | 20832.91                 | 0.3908       |
|       | RT-R-MDA-MB-231 | CTRL siRNA | -        | 9633.89        | 19870.50                 | 1.0289       |
|       |                 |            | ADO      | 36129.50       | 16554.75                 | 2.1824       |
|       |                 | A2AR siRNA | -        | 8052.17        | 20666.18                 | 0.3896       |
|       |                 |            | ADO      | 6268.12        | 21702.98                 | 0.2888       |
| Set 2 | MDA-MB-231      | CTRL siRNA | -        | 5435.91        | 16682.21                 | 1            |
|       |                 |            | ADO      | 13803.57       | 14083.06                 | 0.9802       |
|       |                 | A2AR siRNA | -        | 5840.84        | 16733.60                 | 1.0712       |
|       |                 |            | ADO      | 4451.62        | 17406.74                 | 0.2557       |
|       | RT-R-MDA-MB-231 | CTRL siRNA | -        | 5912.04        | 16216.33                 | 1.1188       |
|       |                 |            | ADO      | 26642.27       | 15928.94                 | 1.6726       |
|       |                 | A2AR siRNA | -        | 6605.14        | 19916.38                 | 0.3316       |
|       |                 |            | ADO      | 4224.63        | 21133.69                 | 0.1999       |
| Set 3 | MDA-MB-231      | CTRL siRNA | -        | 1930.89        | 23963.15                 | 1            |
|       |                 |            | ADO      | 4267.57        | 14538.11                 | 0.2935       |
|       |                 | A2AR siRNA | -        | 1468.46        | 19341.96                 | 0.0759       |
|       |                 |            | ADO      | 1015.53        | 21260.10                 | 0.0478       |
|       | RT-R-MDA-MB-231 | CTRL siRNA | -        | 1902.18        | 22278.81                 | 1.0596       |
|       |                 |            | ADO      | 12450.05       | 21685.43                 | 0.5741       |
|       |                 | A2AR siRNA | -        | 1816.18        | 21011.84                 | 0.0864       |
|       |                 |            | ADO      | 2557.67        | 16444.65                 | 0.1555       |
| Set 4 | MDA-MB-231      | CTRL siRNA | -        | 3419.84        | 16795.26                 | 1            |
|       |                 |            | ADO      | 12471.98       | 17298.13                 | 0.7210       |
|       |                 | A2AR siRNA | -        | 4097.91        | 17003.68                 | 0.2410       |
|       |                 |            | ADO      | 3181.84        | 18003.68                 | 0.1767       |
|       | RT-R-MDA-MB-231 | CTRL siRNA | -        | 4285.48        | 14683.74                 | 0.2919       |
|       |                 |            | ADO      | 21219.71       | 15557.23                 | 1.3640       |
|       |                 | A2AR siRNA | -        | 5051.01        | 19533.41                 | 0.2586       |
|       |                 |            | ADO      | 4198.48        | 18702.94                 | 0.2245       |
| Set 5 | MDA-MB-231      | CTRL siRNA | -        | 4812.55        | 16657.26                 | 1.0000       |
|       |                 |            | ADO      | 12682.86       | 14787.48                 | 0.8577       |
|       |                 | A2AR siRNA | -        | 5397.79        | 17081.60                 | 0.3160       |
|       |                 |            | ADO      | 4861.03        | 18191.15                 | 0.2672       |
|       | RT-R-MDA-MB-231 | CTRL siRNA | -        | 5481.71        | 17103.45                 | 1.1093       |
|       |                 |            | ADO      | 22022.52       | 16087.94                 | 1.3689       |
|       |                 | A2AR siRNA | -        | 5534.67        | 20805.67                 | 0.2660       |
|       |                 |            | ADO      | 6832.84        | 21093.03                 | 0.3239       |

**Table S8 .** Summary of relative Vimentin/ $\beta$ -actin protein levels for Figure 5F

| Vimentin/ $\beta$ -actin | MDA-MB-231 |        |            |         | RT-R-MDA-MB-231 |        |            |        |
|--------------------------|------------|--------|------------|---------|-----------------|--------|------------|--------|
|                          | CTRL siRNA |        | A2AR siRNA |         | CTRL siRNA      |        | A2AR siRNA |        |
|                          | -          | ADO    | -          | ADO     | -               | ADO    | -          | ADO    |
|                          |            |        |            |         |                 |        |            |        |
| $n = 1$                  | 1          | 2.4566 | 1.0251     | 0.8294  | 1.0289          | 4.6313 | 0.8268     | 0.6129 |
| $n = 2$                  | 1          | 3.0080 | 1.0712     | 0.7848  | 1.1188          | 5.1329 | 1.0178     | 0.6135 |
| $n = 3$                  | 1          | 3.6430 | 0.9422     | 0.5928  | 1.0596          | 7.1251 | 1.0727     | 1.9302 |
| $n = 4$                  | 1          | 3.5409 | 1.1836     | 0.8680  | 1.4333          | 6.6987 | 1.2699     | 1.1025 |
| $n = 5$                  | 1          | 2.9686 | 1.0937     | 0.9249  | 1.1093          | 4.7380 | 0.9207     | 1.1212 |
| Mean                     | 1          | 3.123  | 1.063      | 0.8     | 1.15            | 5.665  | 1.022      | 1.076  |
| Std. Deviation           | 0          | 0.4812 | 0.08885    | 0.1267  | 0.1626          | 1.163  | 0.1676     | 0.5387 |
| Std. Error of Mean       | 0          | 0.2152 | 0.03974    | 0.05668 | 0.07271         | 0.5202 | 0.07497    | 0.2409 |
